# Supplementary material for: A realistic physical model of the Gibraltar Strait
Source: Copernicus journal article supplement (doi:10.5194/egusphere-2025-5723), 2025-11-26
Supplement: Supplementary file [file egusphere-2025-5723-AC4-supplement.pdf]

**To the Editor**

We are very grateful to all three referees for the careful review and the positive comments. A point by point answer to each of the referees raised issues is given in blue text in the response documents. All changes have been highlighted by blue text in the revised manuscript.
